# Supplementary material
Source: PubMed Central journal article supplement (PMC5597457)
Supplement: NIHMS862057-supplement-1.pdf [file NIHMS862057-supplement-1.pdf]

1  
2  
3  
4  
5  
6  
7  
8  
9  
10  
11  
12  
13  
14  
15  
16  
17  
18  
19  
20  
21  
22  
23  
24  
25  
26  
27  
28  
29  
30  
31  
32  
33  
34  
35  
36  
37  
38  
39  
40  
41  
42  
43  
44  
45  
46  
47  
48  
49  
50  
51  
52  
53  
54  
55  
56  
57  
58  
59  
60

**Supplementary Fig S1** Conservation of the serine residue at position 589 and leucine residue at position 596 (a), alanine residue at position 633 (b), and arginine residue at position 747 (c) across species

For Review Only

1  
2  
3  
4  
5  
6  
7  
8  
9  
10  
11  
12  
13  
14  
15  
16  
17  
18  
19  
20  
21  
22  
23  
24  
25  
26  
27  
28  
29  
30  
31  
32  
33  
34  
35  
36  
37  
38  
39  
40  
41  
42  
43  
44  
45  
46  
47  
48  
49  
50  
51  
52  
53  
54  
55  
56  
57  
58  
59  
60

a

|                                |     |                  |                      |
|--------------------------------|-----|------------------|----------------------|
| <i>Homo sapiens</i>            | 577 | VRKPKVMLTGTLS    | DRQPAELHLFRNYDAPETV  |
| <i>Pan troglodytes</i>         | 577 | VRKPKVMLTGTLS    | DRQPAELHLFRNYDAPETV  |
| <i>Macaca mulatta</i>          | 594 | VKKPKVMLTGTLS    | DRQPAELHLFRNYDAPETV  |
| <i>Canis lupus</i>             | 607 | VKKPKVMLTGTLS    | DRQPAELHLFRNYEAPESV  |
| <i>Bos taurus</i>              | 617 | VKKPKVMLTGTLS    | DRQPAELHLFRNYEAPESV  |
| <i>Mus musculus</i>            | 578 | VKKPKVMLTGTLS    | DRQPAELHLFRNYDAPEAV  |
| <i>Rattus norvegicus</i>       | 578 | VKKPKVMLTGTLS    | DRQPAELHLFRNYDAPEAV  |
| <i>Gallus gallus</i>           | 568 | VQKPKVIVTGTL     | CDRQPAELHLFRNYPAPETK |
| <i>Dan rerio</i>               | 564 | VTHPRVMVTSVLADRH | PGELHLFRNYDPPALQ     |
| <i>Drosophila melanogaster</i> | 650 | IKHKIMVTGVMADRK  | PVNLHLFRNYTSASDI     |
| <i>Anopheles gambiae</i>       | 666 | IKHPRMLVTGVMADRK | PVNLHLFRNYEAASDI     |
| <i>Caenorhabditis elegans</i>  | 791 | IKYPRFFCTTVRADT  | FPVCLLELRNYRLPISE    |

|                                |                            |     |                                |           |     |
|--------------------------------|----------------------------|-----|--------------------------------|-----------|-----|
| b                              |                            | c   |                                |           |     |
| <i>Homo sapiens</i>            | SDQLVWHAARSSGAAPTYFRPN-GRF | 650 | <i>Homo sapiens</i>            | VDRARAWC  | 750 |
| <i>Pan troglodytes</i>         | SDQLVWHAARSSGAAPTYFRPN-GRF | 650 | <i>Pan troglodytes</i>         | VDRARAWC  | 750 |
| <i>Macaca mulatta</i>          | SDQLVWHAARSSGAAPTYFRPN-GRF | 667 | <i>Macaca mulatta</i>          | VDRARAWC  | 767 |
| <i>Canis lupus</i>             | SDQLVWHAARSSGAAPTYFRPN-GRF | 680 | <i>Canis lupus</i>             | VDRARAWC  | 780 |
| <i>Bos taurus</i>              | SEQLVWHAARSSGAAPTYFRPN-GRF | 690 | <i>Bos taurus</i>              | VDRARAWC  | 790 |
| <i>Mus musculus</i>            | ADQLVWHAARSSGAAPTYFRPN-GRF | 651 | <i>Mus musculus</i>            | VDRARAWC  | 751 |
| <i>Rattus norvegicus</i>       | ADQLVWHAARSSGAAPTYFRPN-GRF | 651 | <i>Rattus norvegicus</i>       | VDRARAWC  | 751 |
| <i>Gallus gallus</i>           | EDQLVWHAARCSGAAPTYFRPI-GRF | 641 | <i>Gallus gallus</i>           | VNRARAWC  | 741 |
| <i>Dan rerio</i>               | EEQLVWHAARSSGAAPTYFRPM-GRF | 662 | <i>Dan rerio</i>               | VDRARAWC  | 762 |
| <i>Drosophila melanogaster</i> | SEQLVWHAARATGAAPSYFRAF-GRF | 723 | <i>Drosophila melanogaster</i> | VDRARAWC  | 823 |
| <i>Anopheles gambiae</i>       | SEQLVWHAARATGAAPSYFRAF-GRF | 739 | <i>Anopheles gambiae</i>       | VDRARAWC  | 839 |
| <i>Caenorhabditis elegans</i>  | NELTIWHAARRSSAAPTIFSASEGKF | 859 | <i>Caenorhabditis elegans</i>  | ITRSEATWC | 955 |

361x270mm (72 x 72 DPI)

Only
